# Supplementary material for: Metal–organic framework derived single-atom catalysts for electrochemical CO2 reduction
Source: Royal Society of Chemistry journal article supplement (doi:10.1039/d2ra06302f), 2022-01-01
Supplement: d2ra06302f1.pdf [file d2ra06302f1.pdf]

# Supporting Information

## Metal-organic frameworks derived single-atom catalysts for electrochemical CO<sub>2</sub> reduction

Mengna Xie,<sup>‡ab</sup> Jiawei Wang,<sup>‡ab</sup> Xian-Long Du,<sup>\*acd</sup> Na Gao,<sup>ad</sup> Tao Liu,<sup>e</sup> Zhi Li,<sup>e</sup>

GuoPing Xiao,<sup>acd</sup> Tao Li<sup>b</sup> and Jian-Qiang Wang<sup>acd</sup>

<sup>a</sup> Key Laboratory of Interfacial Physics and Technology, Shanghai Institute of Applied Physics, Chinese Academy of Sciences, Shanghai 201800

<sup>b</sup> Engineering Research Center of Large-Scale Reactor Engineering and Technology, Ministry of Education, State Key Laboratory of Chemical Engineering, East China University of Science and Technology, Shanghai 200237, China

<sup>c</sup> University of Chinese Academy of Sciences, Beijing 100049, China

<sup>d</sup> Dalian National Laboratory for Clean Energy, Chinese Academy of Sciences, Dalian 116023, China

<sup>e</sup> Shandong Energy Group Co., Ltd., Jinan 250014, China

\* Corresponding Author

E-mail: [duxianlong@sinap.ac.cn](mailto:duxianlong@sinap.ac.cn)

‡These authors contributed equally to this work.

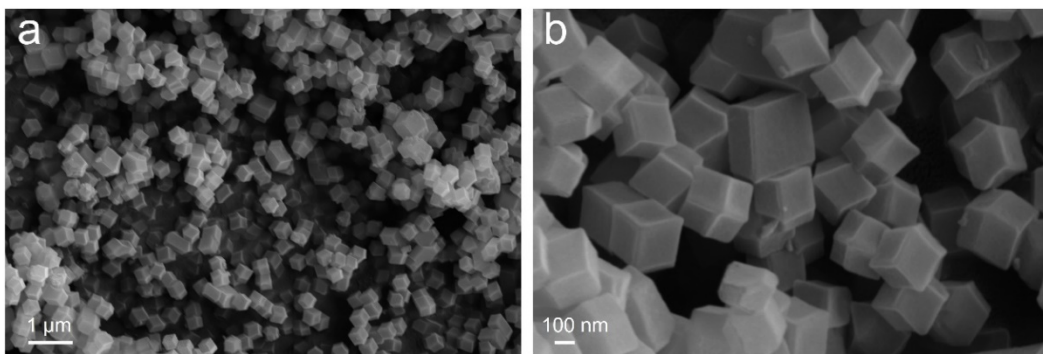

**Figure S1.** (a) and (b) SEM images of ZIF-8. It is obvious that the synthesized ZIF-8 exhibits a uniform rhomb dodecahedral shape.

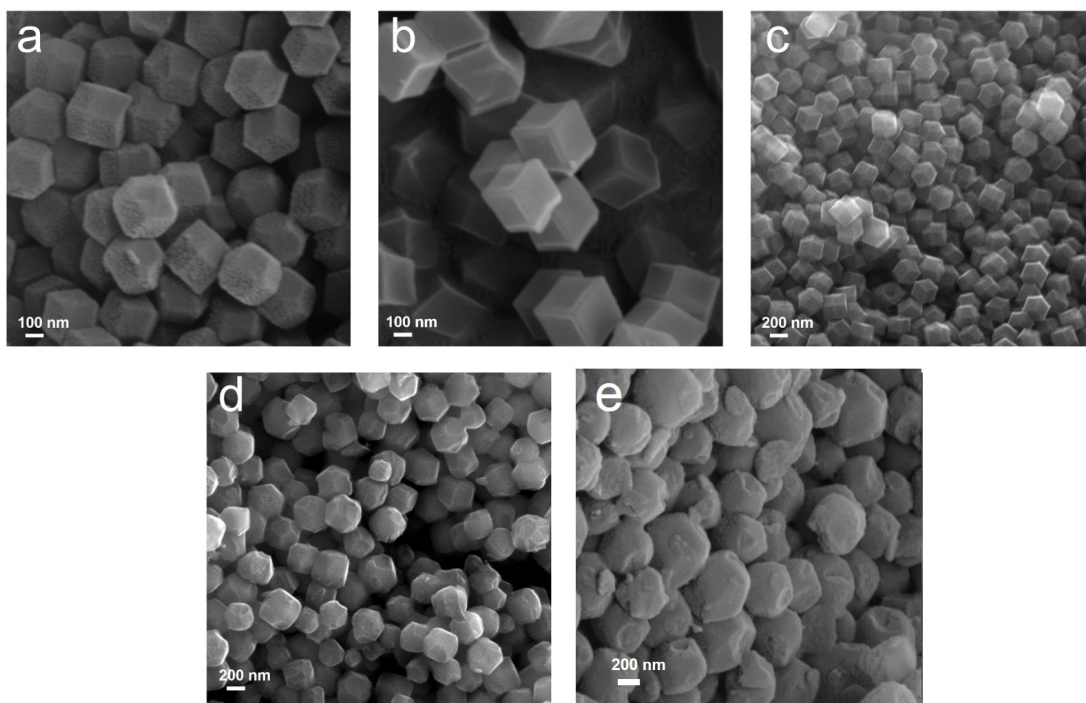

**Figure S2.** SEM characterization of M-N-C. SEM images of (a) Fe-N-C, (b) Ni-N-C, (c) Mn-N-C, (d) Co-N-C and (e) Cu-N-C.

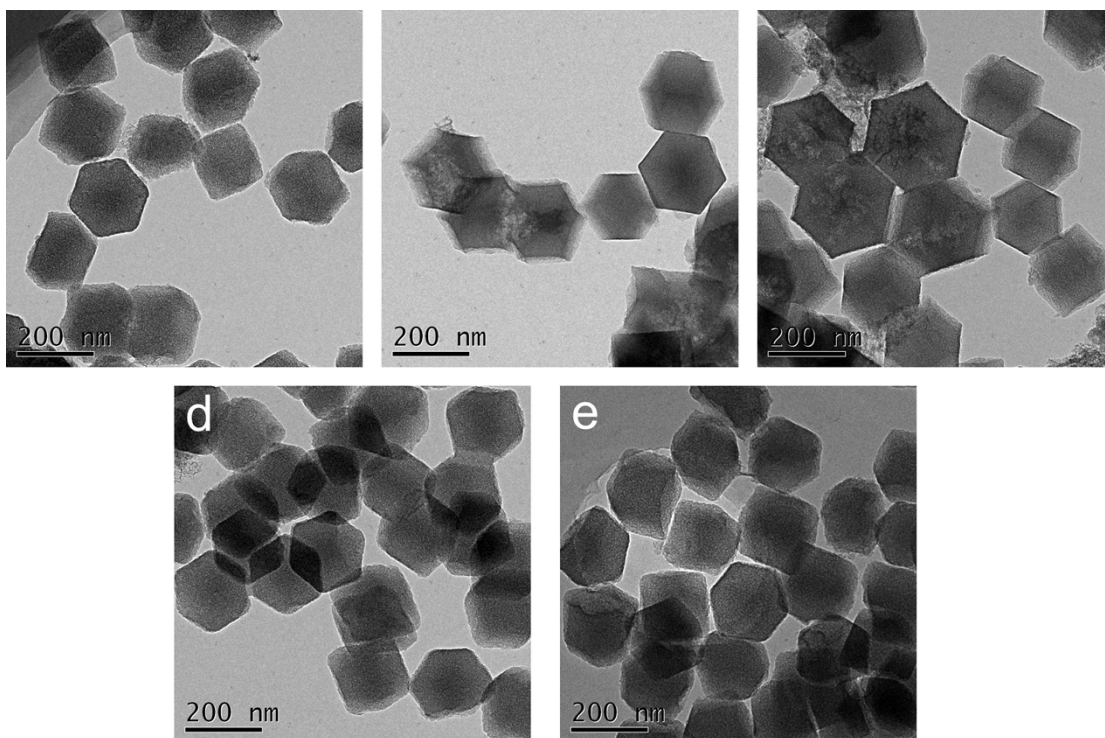

**Figure S3.** TEM characterization of M-N-C. TEM images of (a) Fe-N-C, (b) Ni-N-C, (c) Mn-N-C, (d) Co-N-C and (e) Cu-N-C.

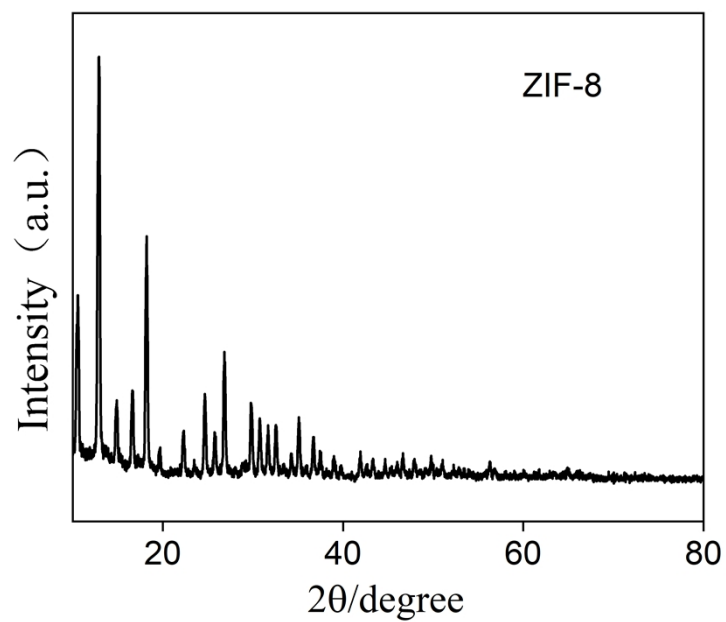

**Figure S4.** XRD pattern of ZIF-8.

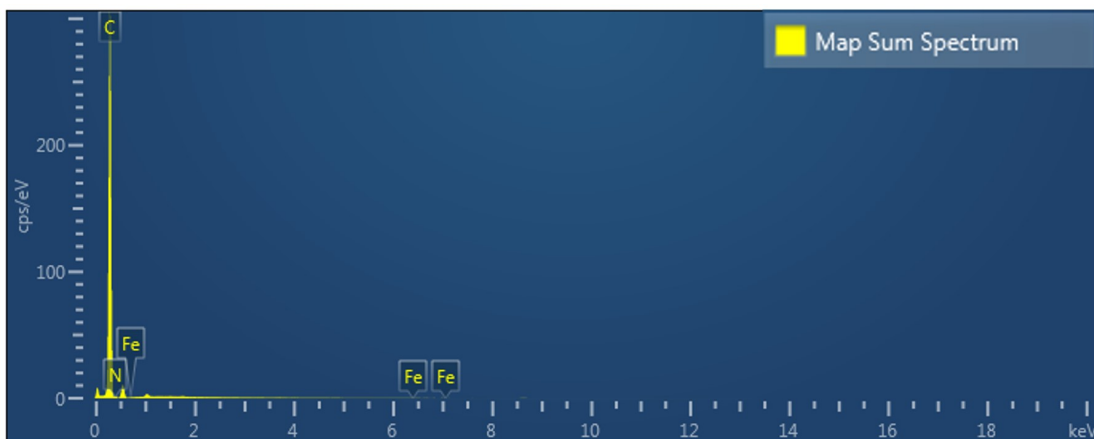

**Figure S5.** Energy dispersive spectroscopy (EDS) characterization of Fe-N-C. No visible Zn signal locating at 8.63 keV was detected in Fe-N-C, suggesting low residual Zn content.

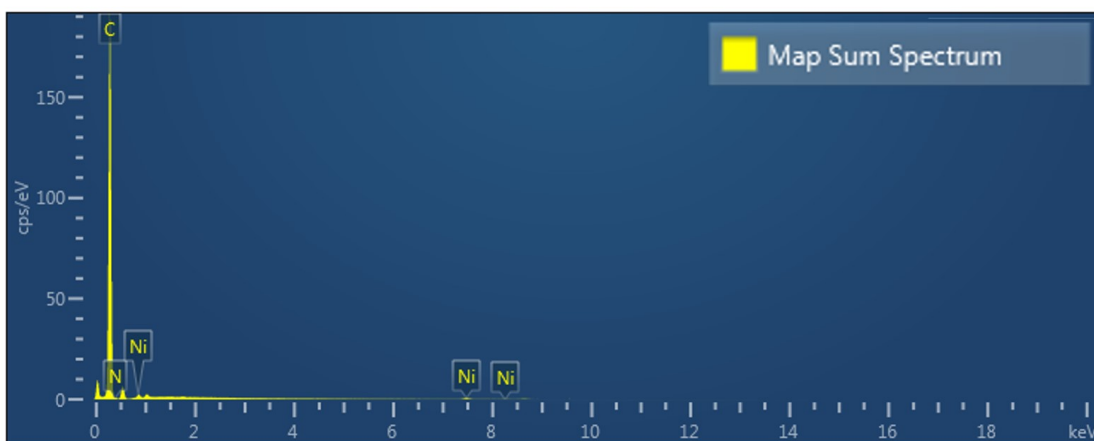

**Figure S6.** Energy dispersive spectroscopy (EDS) characterization of Ni-N-C. No visible Zn signal locating at 8.63 keV was detected in Ni-N-C, suggesting low residual Zn content.

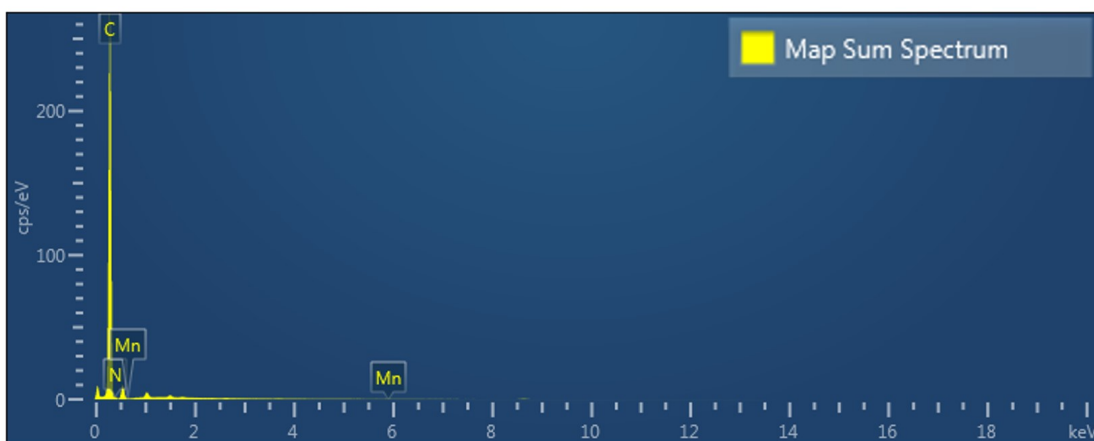

**Figure S7.** Energy dispersive spectroscopy (EDS) characterization of Mn-N-C. No visible Zn signal locating at 8.63 keV was detected in Fe-N-C, suggesting low residual Zn content.

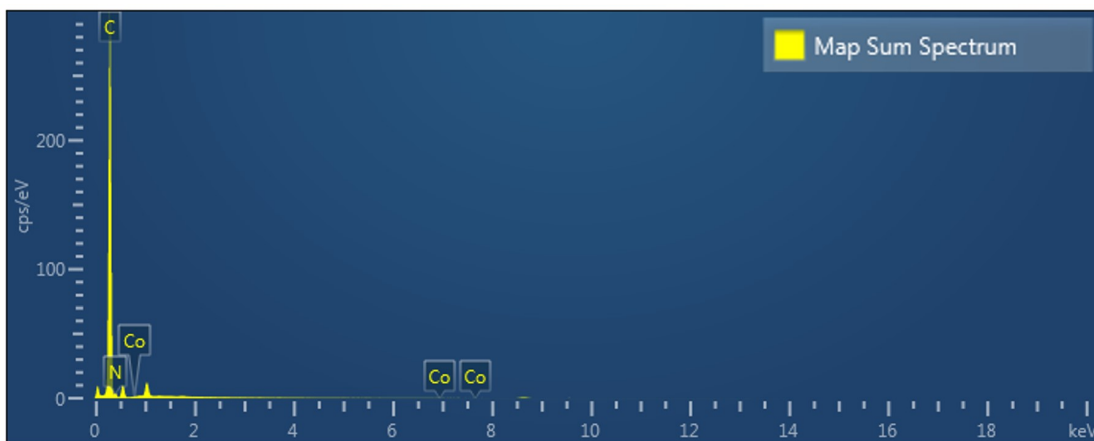

**Figure S8.** Energy dispersive spectroscopy (EDS) characterization of Co-N-C. No visible Zn signal locating at 8.63 keV was detected in Co-N-C, suggesting low residual Zn content.

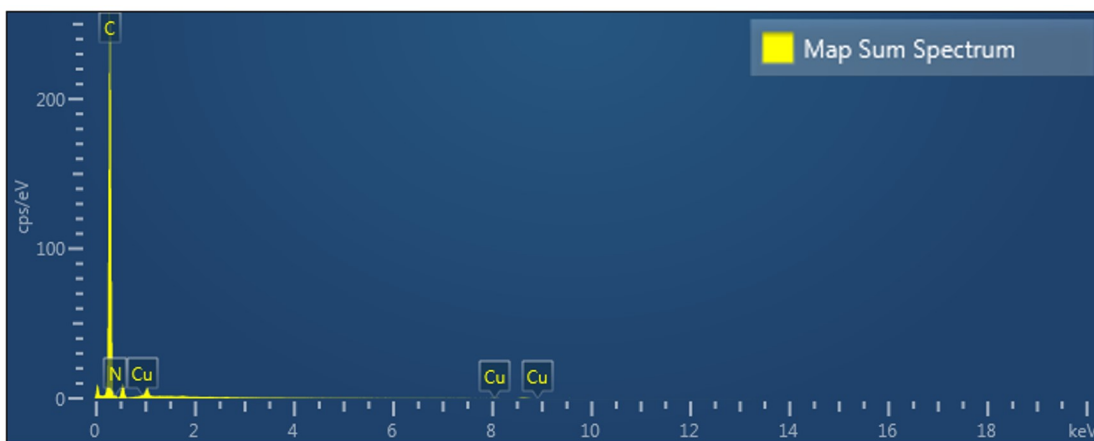

**Figure S9.** Energy dispersive spectroscopy (EDS) characterization of Cu-N-C. No visible Zn signal locating at 8.63 keV was detected in Cu-N-C, suggesting low residual Zn content.

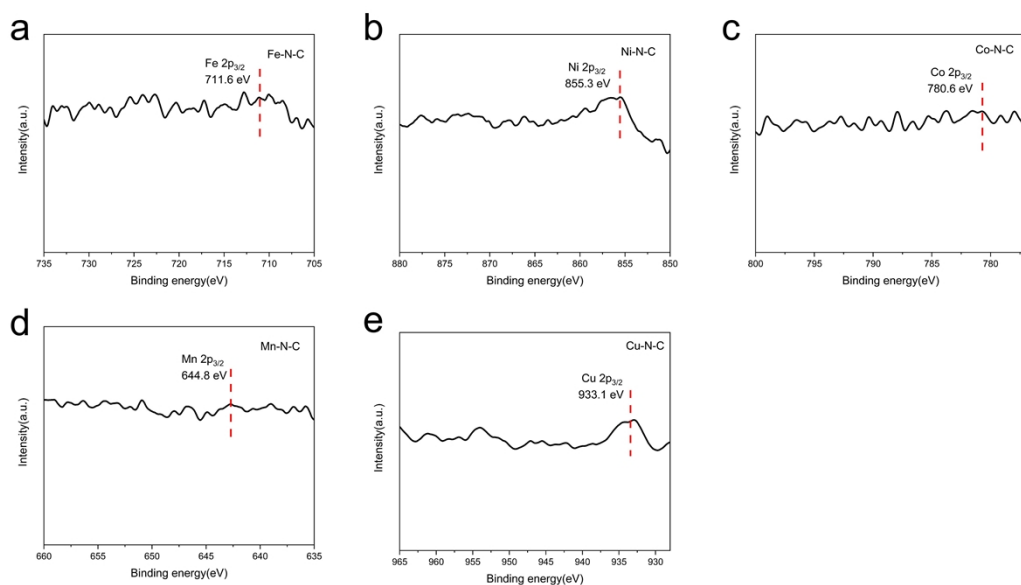

**Figure S10.** (a) Fe 2p spectrum of Fe-N-C, (b) Ni 2p spectrum of Ni-N-C, (c) Mn 2p spectrum of Mn-N-C, (d) Co 2p spectrum of Co-N-C and (e) Cu 2p spectrum of Cu-N-C

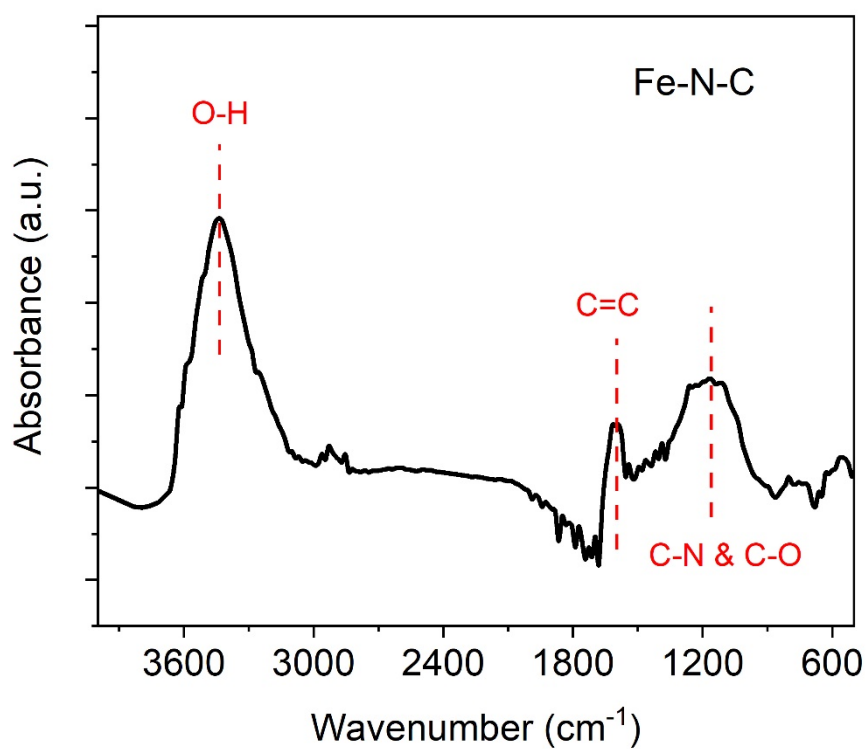

**Figure S11.** FT-IR spectra of Fe-N-C.

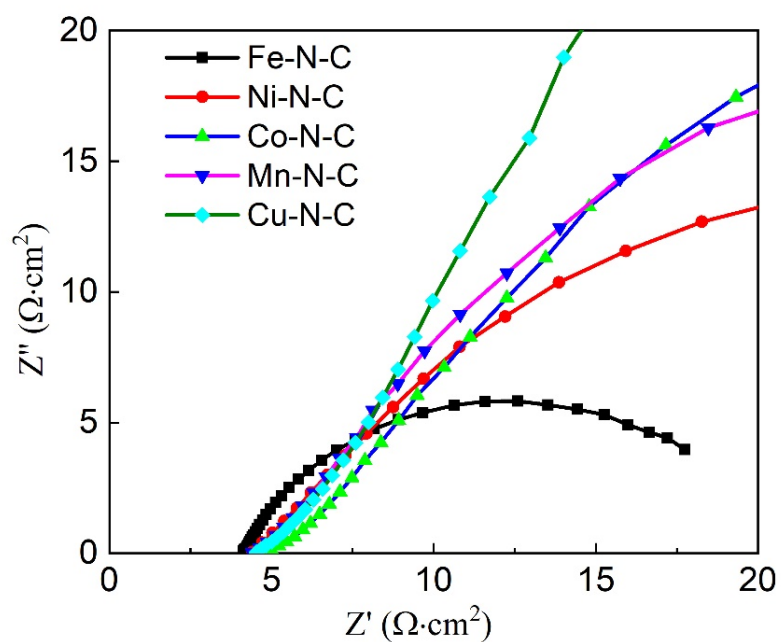

**Figure S12.** Nyquist plots of M-N-C catalysts in  $\text{CO}_2$ -saturated 0.5 M  $\text{KHCO}_3$  solution at -0.5 V vs RHE.

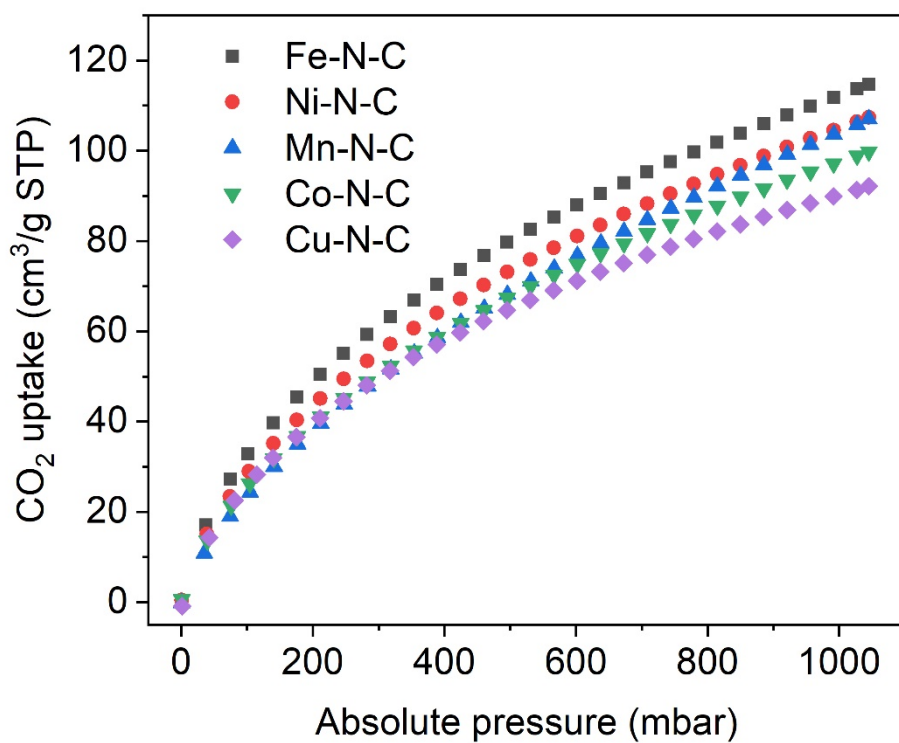

**Figure S13.**  $\text{CO}_2$  physisorption isotherm at 273 K.

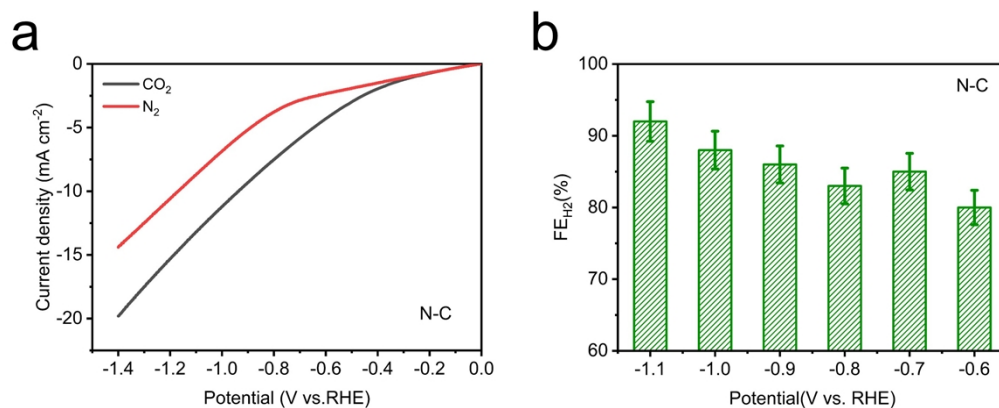

**Figure S14.** Electrocatalytic CO<sub>2</sub>RR Performance of N-C catalyst using a flow cell (a) LSV curves in pure N<sub>2</sub>- and CO<sub>2</sub>-saturated 0.5 M KHCO<sub>3</sub> at a scan rate of 10 mV s<sup>-1</sup>. (b) FE for H<sub>2</sub> production measured in CO<sub>2</sub>-saturated 0.5 M KHCO<sub>3</sub>

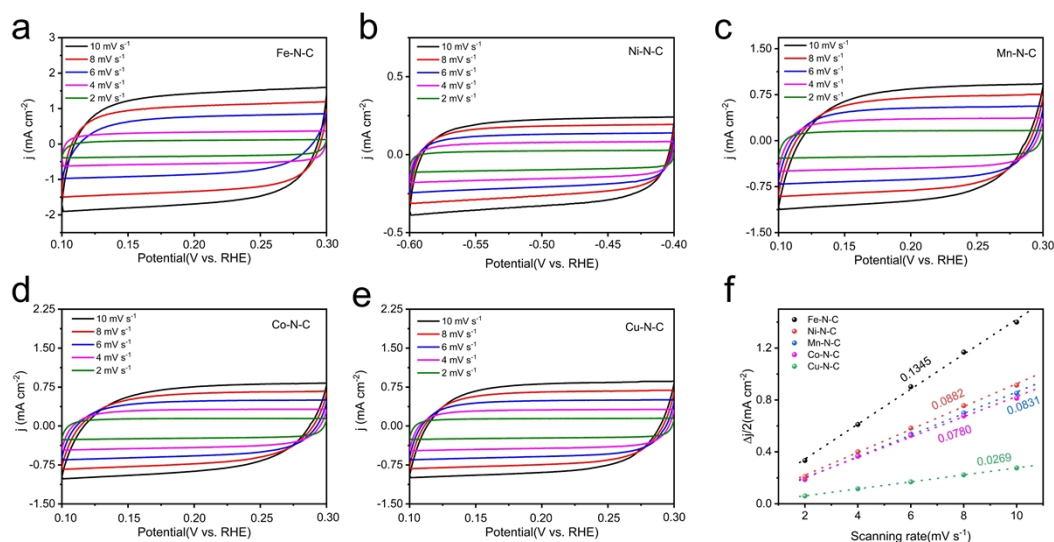

**Figure S15.** CV curves of (a) Fe-N-C, (b) Ni-N-C, (c) Mn-N-C, (d) Co-N-C and (e) Cu-N-C. The CV measurements were performed in CO<sub>2</sub>-saturated 0.5 M KHCO<sub>3</sub> at various scan rates: 2, 4, 6, 8 and 10 mV s<sup>-1</sup>. (f) A plot of changing current density against scan rates for electrochemically active surface area (ECSA) measurements. As clearly shown, ECSA of the M-N-C catalysts increased in the following order of Fe-N-C > Ni-N-C > Mn-N-C > Co-N-C > Cu-N-C, coinciding with the FE<sub>CO</sub> results.



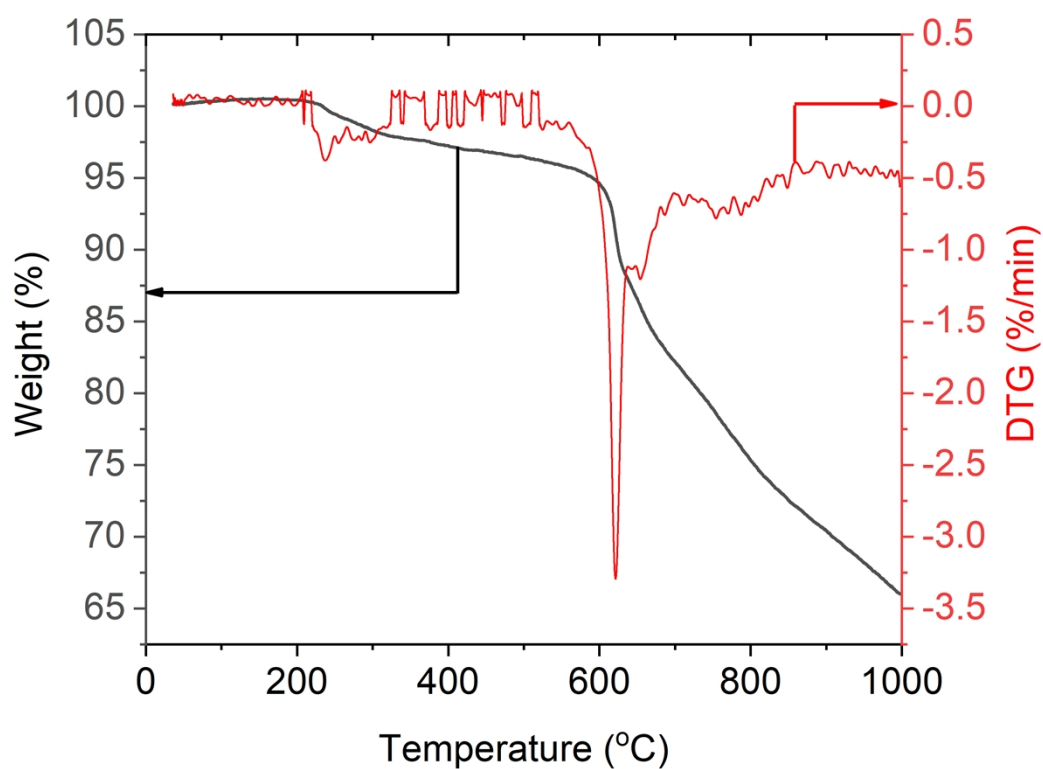

**Figure S16.** TG-DTG patterns of the composite of  $\text{Fe}(\text{NO}_3)_3$  adsorbed within ZIF-8.

**Table S1.** Metal contents of all M-N-C samples determined by ICP-MS

| Sample | Metal content (wt%) |
|--------|---------------------|
| Fe-N-C | 0.48                |
| Ni-N-C | 0.65                |
| Mn-N-C | 0.58                |
| Co-N-C | 0.52                |
| Cu-N-C | 0.68                |
